# Supplementary material
Source: PubMed Central journal article supplement (PMC3639473)
Supplement: NIHMS361234-supplement-Supplemental_Data_.pdf [file NIHMS361234-supplement-Supplemental_Data_.pdf]

## Supplemental on-line Material

**Table S1.** Degenerate primers for amplification of CYP1B and CYP1C partial cDNAs.

| Name  | Sequence (5' → 3')         |
|-------|----------------------------|
| DVIF1 | TAYGGCAAYRTNTTTCAGAT       |
| DVIF2 | CAGGAYGAYGCNGARTT          |
| DVIF3 | GATGTNATGCCITGGYTNA        |
| DVIR1 | AAYTCNGCRTCRCTCGTG         |
| DVIR2 | GGATCRTGRTTNACIGACCAITGATT |

**Table S2.** Specific primers for 5' and 3' RACE reactions.

| Name           | Sequence (5' – 3')           |
|----------------|------------------------------|
| 5race-1B-4CMK  | CCCAAAGTAAGACTGCGTCCCCT      |
| 5race-1B-17CMK | CTGCCAGCCCCACACTCCTTGT       |
| 5race-1B-32CMK | GCGTGGGGAATGGTGACAGGAAC      |
| 3race-1B-4CMK  | GGACGCAGTCTTACTTTTGGGTGC     |
| 3race-1B-22CMK | TGGCTCCAGTGCTTCCCAATCC       |
| 3race-1B-38CMK | GTTCTGTCCACATTCCCCACGC       |
| 5race-1C-4CMK  | GGTTTGGGAAGGTTAGAAGCCAGG     |
| 5race-1C-18CMK | CCTGCTTCTTCTGCCTGTTCTATGTGAC |
| 5race-1C-40CMK | CCAGGTGAGGGCAGTAGCAGTGG      |
| 3race-1C-17CMK | CACCGACAGACCTACAAGCCAGAG     |
| 3race-1C-37CMK | CCACTGCTACTGCCCTCACCTGG      |
| 3race-1C-82CMK | CATTCCCCAGGACACGGTGGTCCT     |

**Table S3.** Specific PCR primers for amplification of CYP1B and CYP1C open reading frames

| Product | Primer Name | Sequence (5' → 3')        |
|---------|-------------|---------------------------|
| CYP1B   | F4-1BCMK    | GCCCTCACATCCAAGGGAACCTAAA |
|         | R2-1BCMK    | ACTTGGTGGTCAGACTGGTGGGAAA |
| CYP1C   | 83FOR-1C    | ATAGACCTCTGTTCCAGGGCTTGC  |
|         | 1944REV-1C  | CACAAGAATAGAGTCCGTTTGGCG  |

**Table S4.** Amino acid sequences used in phylogenetic analysis of *X. laevis* CYP1s.

| Sequence                                | Accession Number |
|-----------------------------------------|------------------|
| Chicken ( <i>Gallus gallus</i> ) CYP1A4 | NP_990478.1      |
| Chicken ( <i>Gallus gallus</i> ) CYP1A5 | NP_990477.1      |
| Chicken ( <i>Gallus gallus</i> ) CYP1C1 | XP_001233595     |
| <i>Fundulus heteroclitus</i> CYP2N1     | AAD54015.1       |
| Human ( <i>Homo sapiens</i> ) CYP1A1    | NP_000490.1      |
| Human ( <i>Homo sapiens</i> ) CYP1A2    | NP_000752.2      |
| Human ( <i>Homo sapiens</i> ) CYP1B1    | NP_000095.2      |
| Human ( <i>Homo sapiens</i> ) CYP2A6    | NP_000753.3      |
| Mouse ( <i>Mus musculus</i> ) CYP1A1    | NP_034122.1      |
| Mouse ( <i>Mus musculus</i> ) CYP1A2    | NP_034123.1      |
| Mouse ( <i>Mus musculus</i> ) CYP1B1    | NP_034124.1      |
| <i>Xenopus laevis</i> CYP1A6            | NP_001165708.1   |
| <i>Xenopus laevis</i> CYP1A7            | NP_001090541.1   |
| <i>Xenopus laevis</i> CYP1B             | JN089388         |
| <i>Xenopus laevis</i> CYP1C             | JN089389         |
| <i>Xenopus tropicalis</i> CYP1A         | NP_001090813.1   |
| <i>Xenopus tropicalis</i> CYP1B         | ADR10204.1       |
| <i>Xenopus tropicalis</i> CYP1C         | NP_001191176.1   |
| <i>Xenopus tropicalis</i> CYP1D         | ADR10206.1       |
| Zebrafish ( <i>Danio rerio</i> ) CYP1A  | NP_571954.1      |
| Zebrafish ( <i>Danio rerio</i> ) CYP1B  | NP_001139180.1   |
| Zebrafish ( <i>Danio rerio</i> ) CYP1C1 | NP_001018446.2   |
| Zebrafish ( <i>Danio rerio</i> ) CYP1C2 | NP_001108321.1   |
| Zebrafish ( <i>Danio rerio</i> ) CYP1D1 | NP_001007311.1   |

**Table S5.** Quantitative PCR primers.

| Transcript | Forward Primer (5' → 3')  | Reverse Primer (5' → 3') |
|------------|---------------------------|--------------------------|
| CYP1A6     | GCTTGGTTGGTGATGGGAAG      | TCTGCGTCGAGCTCTCCAC      |
| CYP1A7     | ATGACTTTTCAGCAGTGATTCTGGA | AAGCCTGCGTCGAGCTCTC      |
| CYP1B      | CCCCTCTCACCAGACCTAAGAA    | CTGGTACTCTCAGTGGGCAGAA   |
| CYP1C      | TGCGCCTTGTGCTTTGG         | GCCGATCAGGGCTTTGAAC      |
| β-actin    | GCACCCTGAATCCTAAAGC       | CAATGATGAAGAAGAGGCAGC    |

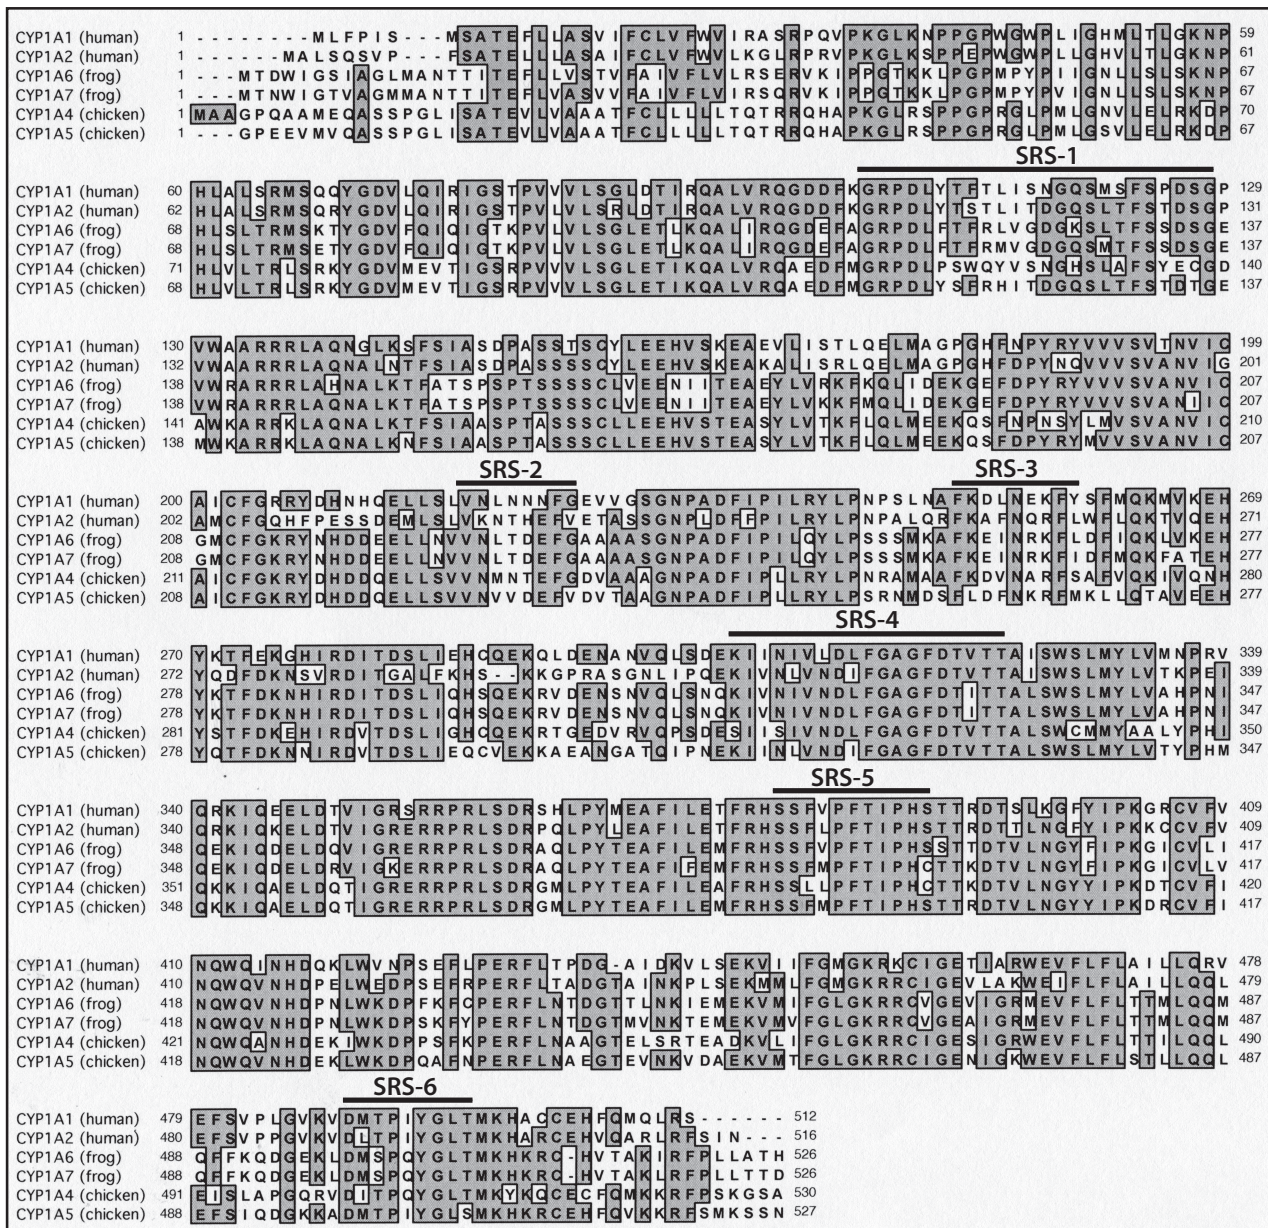

Figure S1. Alignment of full-length amino acid sequences of human, frog, and chicken CYP1As. Black bars above each line indicate positions homologous to previously defined substrate recognition sequences (SRS; Gotoh 1992).
